# Supplementary material for: Molecular Variability of the Fusarium solani Species Complex Associated with Fusarium Wilt of Melon in Iran
Source: J Fungi (Basel). 2023 Apr 18;9(4):486. doi: 10.3390/jof9040486 (PMC10142084; doi:10.3390/jof9040486)
Supplement: Supplementary file 1 [file jof-09-00486-s001.zip › Figure S4.pdf]

Phylogenetic tree showing the relationships between various *Fusarium* species and strains, based on ITS1 and ITS2 sequences. The tree is rooted with *Fusarium staphyleae* NRRL 22316 as the outgroup. Bootstrap values are indicated at the nodes.

Species and Strains included:

- Fusarium falciforme* (NRRL 32308, NRRL 28562, NRRL 28555, FRC S-1952, FRC S-1958, FRC S-1973, NRRL 32718, Ga-r-30, Ka-s-82, Khaf-400, Ga-s-2, Kno-r2-b, Kno-2, TJ-90, TJ-3, Tk-rs-1, Yazd-m-23, Kht-r-11, Far-8, Iv2-r-30, Iv-k-21, Se-r-19, Toh-r-3, Toh-r-4)
- Fusarium keratoplasticum* (NRRL 32959, Iv-km-50, NRRL 32780)
- Fusarium vanettenii* (NRRL 22820, NRRL 22278, Toh-r-1, Iv-km-17, Iv-km-11, Far-317, Yazd-m-2, Iv-k-82)
- Fusarium virguliforme* NRRL 22825
- Fusarium illudens* NRRL 22090
- Fusarium solani* f. sp. *cucurbitae* MPI NRRL 22153, MPI NRRL 22098
- Nectria plagianthi* NRRL 22632
- Fusarium petrophilum* NRRL 22141
- Fusarium solani* f. sp. *morii* MPIIII NRRL 22157, MPVII NRRL 22586, MPIIII NRRL 22230, MPVII NRRL 22161
- Fusarium* FSSC 5-k NRRL 32737, FSSC 5-l NRRL 32791, FSSC 5-i NRRL 31168, FSSC 5-m NRRL 32810, FS-Spa, Tay-r2-r

Scale bar: 0.005
