# Supplementary material for: Molecular Variability of the Fusarium solani Species Complex Associated with Fusarium Wilt of Melon in Iran
Source: J Fungi (Basel). 2023 Apr 18;9(4):486. doi: 10.3390/jof9040486 (PMC10142084; doi:10.3390/jof9040486)
Supplement: Supplementary file 1 [file jof-09-00486-s001.zip › Table S1.pdf]

Table S1

| Species                                       | Isolate    | Country | Year | Source      | Accession numbers |          |             |
|-----------------------------------------------|------------|---------|------|-------------|-------------------|----------|-------------|
|                                               |            |         |      |             | ITS               | LSU      | <i>tef1</i> |
| <i>F. falciforme</i>                          | Se-r-19    | Iran    | 2010 | long melon  | OQ396678          | OQ308937 | OP957290    |
|                                               | Khaf-400   | Iran    | 2009 | long melon  | OQ396679          | OQ308938 | OP957291    |
|                                               | Toh-r-3    | Iran    | 2009 | long melon  | OQ396680          | OQ308939 | OQ428629    |
|                                               | Toh-r-4    | Iran    | 2009 | long melon  | OQ396681          | OQ308940 | OP957296    |
|                                               | Iv-k-21    | Iran    | 2011 | long melon  | OQ396682          | OQ308941 | OP957292    |
|                                               | Iv2-r-30   | Iran    | 2009 | long melon  | OQ396683          | OQ308942 | OQ428630    |
|                                               | Yazd-m-23  | Iran    | 2010 | cantaloupe  | OQ396684          | OQ308943 | OP957295    |
|                                               | Tj-90      | Iran    | 2009 | long melon  | OQ396685          | OQ308944 | OQ428642    |
|                                               | Tk-rs-1    | Iran    | 2011 | cantaloupe  | OQ396686          | OQ308945 | OQ428643    |
|                                               | Ga-r-30    | Iran    | 2009 | cantaloupe  | OQ396687          | OQ308946 | OQ428631    |
|                                               | Ga-s-2     | Iran    | 2011 | cantaloupe  | OQ396688          | OQ308947 | OQ428632    |
|                                               | Ka-s-82    | Iran    | 2010 | long melon  | OQ396689          | OQ308948 | OQ428633    |
|                                               | Tj-3       | Iran    | 2010 | long melon  | OQ396690          | OQ308949 | OQ428645    |
|                                               | Far-8      | Iran    | 2011 | long melon  | OQ396691          | OQ308950 | OP957297    |
|                                               | Kht-r-f1   | Iran    | 2009 | long melon  | OQ396692          | OQ308951 | OQ428644    |
|                                               | Kno-2      | Iran    | 2009 | cantaloupe  | OQ396693          | OQ308952 | OP957293    |
|                                               | Kho-r2-b   | Iran    | 2011 | cantaloupe  | OQ396694          | OQ308953 | OP957294    |
|                                               | NRRL 32718 | USA     | 2006 | human eye   | DQ094500          | DQ236542 | DQ247038    |
|                                               | FRC S-1973 | Aust    | 2011 | soil        | JF433073          | JF433073 | DQ247494    |
|                                               | FRC S-1958 | Aust    | 2011 | soil        | JF433064          | JF433064 | DQ247481    |
|                                               | FRC S-1952 | Aust    | 2011 | soil        | JF433060          | JF433060 | DQ247487    |
|                                               | NRRL 28555 | USA     | 2006 | human wrist | DQ094369          | DQ236411 | DQ246896    |
|                                               | NRRL 28562 | USA     | 2006 | human bone  | DQ094376          | DQ236418 | DQ246903    |
|                                               | NRRL 32308 | SA      | 2006 | Human foot  | DQ094406          | DQ236448 | DQ246936    |
| <i>F. illudens</i>                            | NRRL 22090 | USA     | ND   | ND          | AF178393          | AF178362 | AF178326    |
| <i>F. keratoplasticum</i>                     | Iv-km-50   | Iran    | 2009 | long melon  | OQ396703          | OQ308962 | OP957298    |
|                                               | NRRL 32780 | USA     | 2006 | Sea turtle  | DQ094551          | DQ236593 | DQ247090    |
|                                               | NRRL 32959 | USA     | 2006 | Human skin  | DQ094632          | DQ236674 | DQ247178    |
| <i>F. petroliphilum</i>                       | NRRL 22141 | USA     | 2007 | ND          | DQ094307          | DQ236349 | AF178329    |
| <i>F. plagianthi</i>                          | NRRL 22632 | USA     | 1999 | ND          | AF178417          | AF178386 | AF178354    |
|                                               | NRRL 22098 | USA     | 2005 | ND          | DQ094301          | DQ236343 | AF178327    |
| <i>F. solani</i> f. sp. <i>cucurbitae</i> MPI | NRRL 22153 | USA     | 1999 | ND          | AF178410          | AF178379 | AF178346    |
| <i>F. solani</i> f. sp. <i>mori</i> MPIII     | NRRL 22157 | USA     | 1999 | ND          | AF178421          | AF178390 | AF178359    |

|                                         |                      |          |       |                    |                 |                 |                 |
|-----------------------------------------|----------------------|----------|-------|--------------------|-----------------|-----------------|-----------------|
| <i>F. solani</i> f. sp. <i>robiniae</i> | NRRL 22230           | USA      | 1999  | ND                 | AF178420        | AF178389        | AF178358        |
|                                         | NRRL 22161           | USA      | 2005  | Rubinea            | DQ094311        | DQ236353        | AF178330        |
|                                         | MPVII                | USA      | 2005  | Rubinea            | DQ094312        | DQ236354        | AF178353        |
|                                         | FSSC 5               | Tay-r2-r | Iran  | long melon         | <b>OQ396695</b> | <b>OQ308954</b> | <b>OQ428640</b> |
|                                         |                      | FS-Spa   | Spain | ND                 | <b>OQ396696</b> | <b>OQ308955</b> | <b>OQ428641</b> |
| <i>F. staphyleae</i>                    | NRRL 31168           | USA      | 2006  | human toe leukemia | DQ094395        | DQ236437        | DQ246922        |
|                                         | NRRL 32810           | USA      | 2006  | Human eye          | DQ094577        | DQ236619        | DQ247118        |
|                                         | NRRL 32737           | USA      | 2006  | Human eye          | DQ094518        | DQ236560        | DQ247057        |
|                                         | NRRL 32791           | USA      | 2006  | human              | DQ094560        | DQ236602        | DQ247100        |
|                                         | NRRL 22316           | USA      | 1999  | ND                 | AF178423        | AF178392        | AF178361        |
|                                         | <i>F. vanettenii</i> | Iv-k-62  | Iran  | long melon         | <b>OQ396697</b> | <b>OQ308956</b> | <b>OQ428634</b> |
|                                         |                      | Far-317  | Iran  | long melon         | <b>OQ396698</b> | <b>OQ308957</b> | <b>OQ428635</b> |
|                                         |                      | Iv-km-11 | Iran  | long melon         | <b>OQ396699</b> | <b>OQ308958</b> | <b>OQ428636</b> |
|                                         |                      | Iv-km-17 | Iran  | long melon         | <b>OQ396700</b> | <b>OQ308959</b> | <b>OQ428637</b> |
|                                         |                      | Toh-r-1  | Iran  | long melon         | <b>OQ396701</b> | <b>OQ308960</b> | <b>OQ428638</b> |
| <i>F. virguliforme</i>                  |                      | Yazd-m-2 | Iran  | long melon         | <b>OQ396702</b> | <b>OQ308961</b> | <b>OQ428639</b> |
|                                         | NRRL 22820           | USA      | ND    | ND                 | DQ094310        | DQ236352        | AF178355        |
|                                         | NRRL 22278           | USA      | ND    | ND                 | DQ094309        | DQ236351        | AF178337        |
|                                         | NRRL 22825           | USA      | 1999  | ND                 | GU170655        | AF178388        | AF178357        |

**ND: not determined;** Aust: Australia; SA: Saudi Arabia

GenBank accessions of the strains from this study are indicated in bold.

*Fusarium staphyleae* was used as the outgroup.
